# Supplementary material for: CD79a promotes CNS-infiltration and leukemia engraftment in pediatric B-cell precursor acute lymphoblastic leukemia
Source: PubMed Central journal article supplement (PMC7810877; doi:10.1038/s42003-020-01591-z), 2021-01-15
Supplement: 42003_2020_1591_MOESM3_ESM.pdf [file 42003_2020_1591_MOESM3_ESM.pdf]

## **Description of Additional Supplementary Files**

File Name: Supplementary Data 1

Description: Source data
